# Supplementary material
Source: ML conference proceedings conference paper supplement (https://openreview.net/forum?id=0Fg1OcePHH)

**a**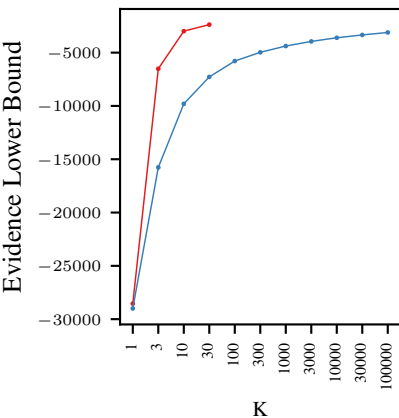**b**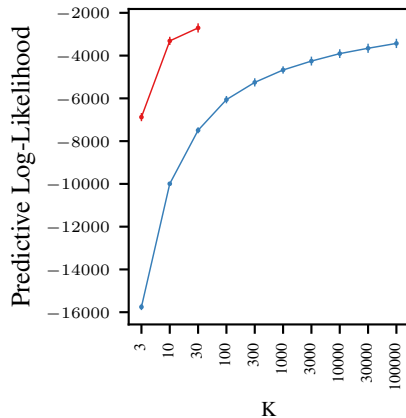**c**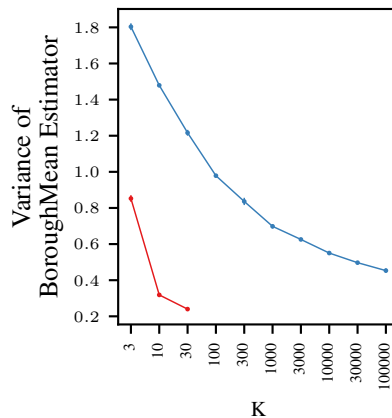**d**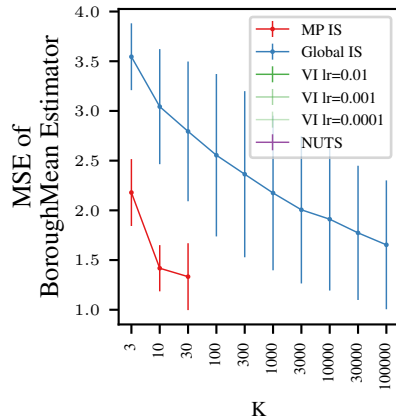**Evidence Lower Bound**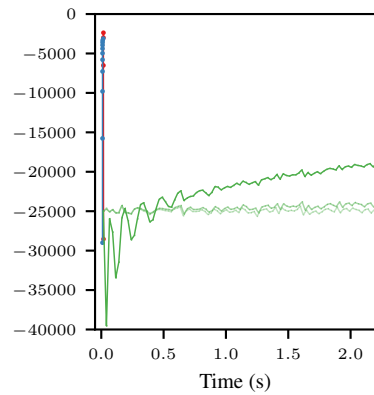**Predictive Log-Likelihood**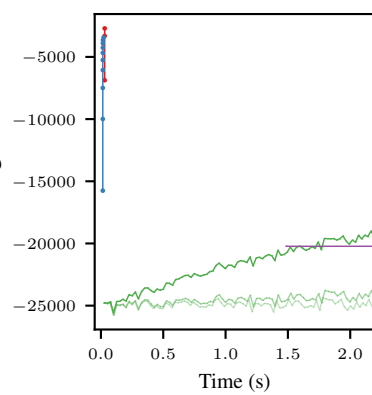**Variance of BoroughMean Estimator**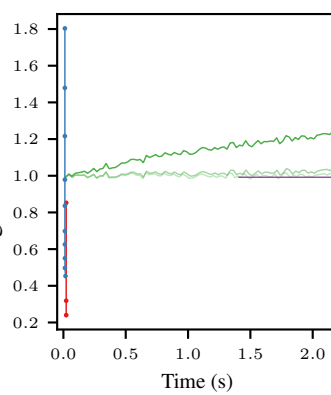**MSE of BoroughMean Estimator**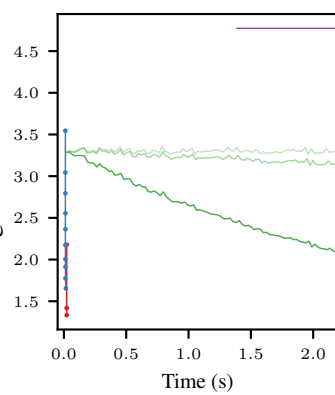

Supplement: supplementary_material [file attachment]
