# Supplementary material
Source: ML conference proceedings conference paper supplement (https://openreview.net/forum?id=0Fg1OcePHH)

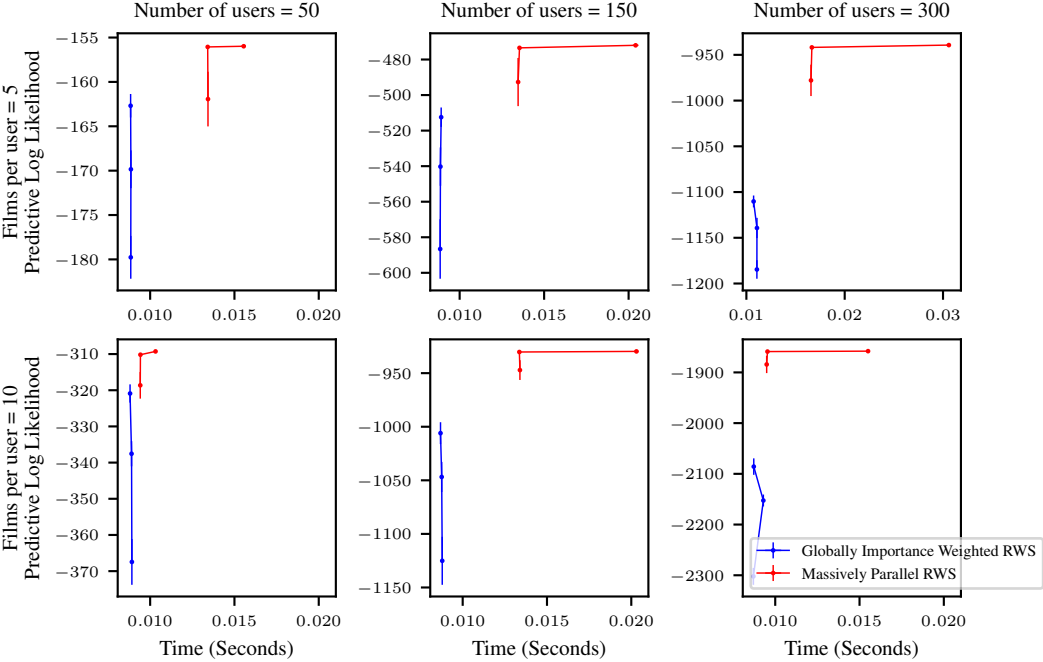

Supplement: supplementary_material [file attachment]

Evidence Lower Bound

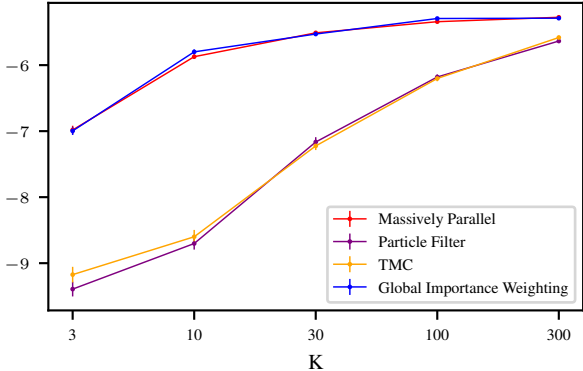

Supplement: supplementary_material [file attachment]

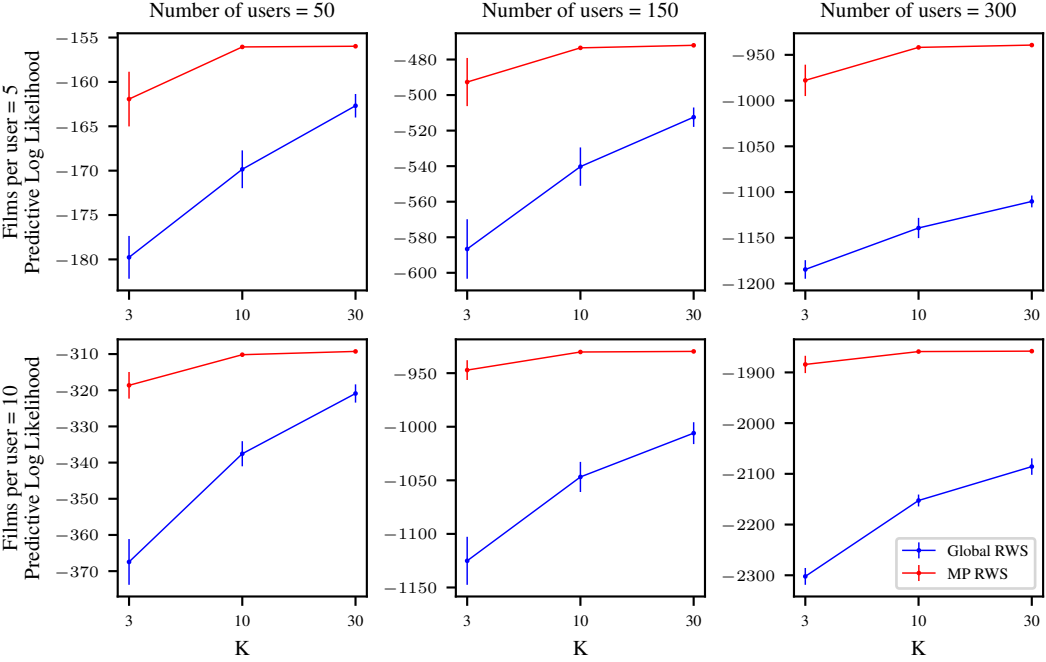

Supplement: supplementary_material [file attachment]

**a**

Evidence Lower Bound

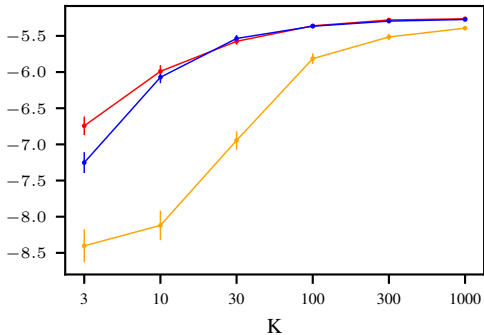

Supplement: supplementary_material [file attachment]

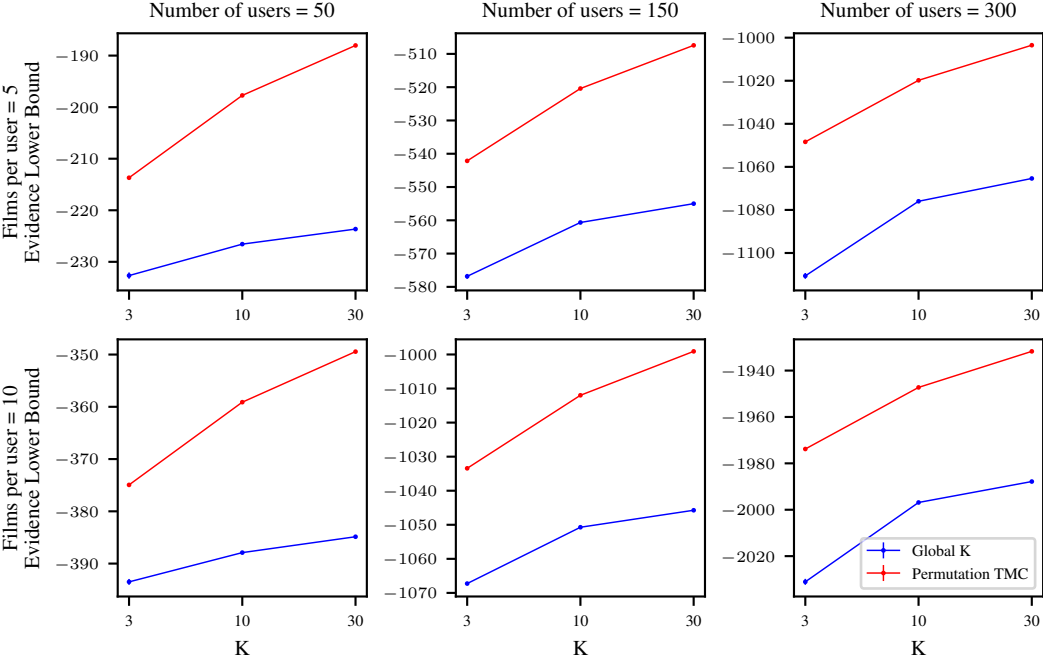

Supplement: supplementary_material [file attachment]

**b**

Number of users = 300

Films per user = 5  
Predictive Log Likelihood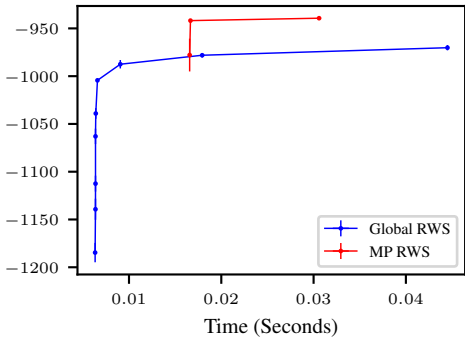

Supplement: supplementary_material [file attachment]

**a**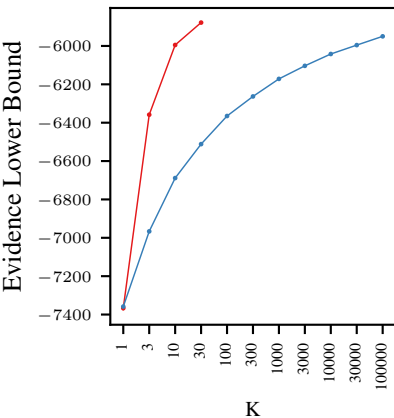**b**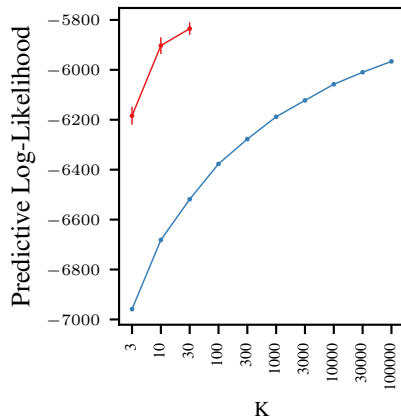**c**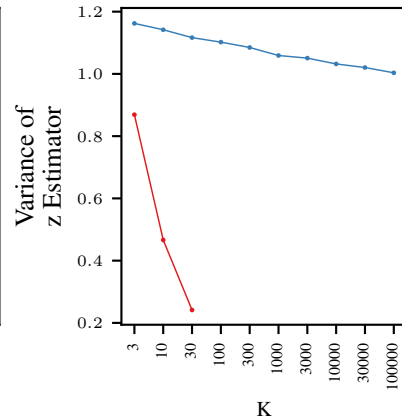**d**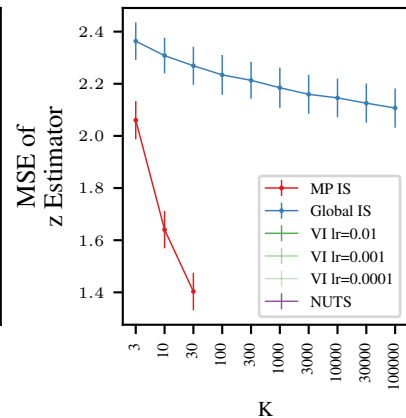**e**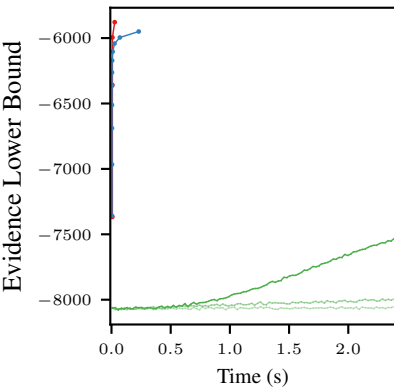**f**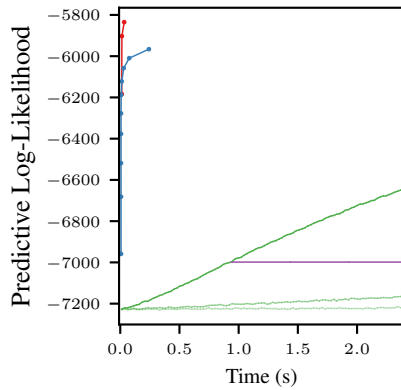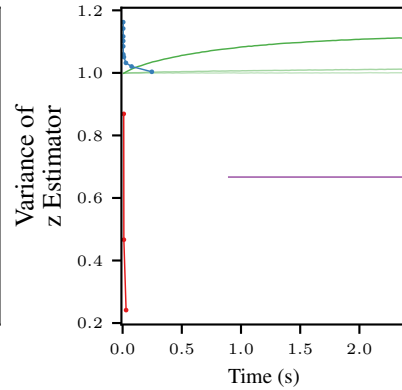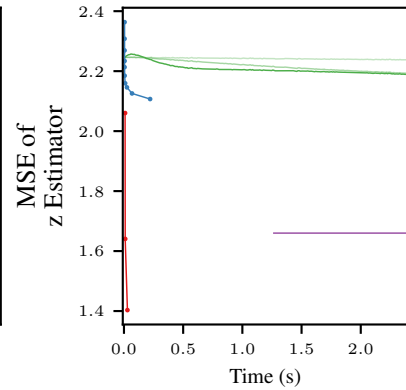

Supplement: supplementary_material [file attachment]

**a**

Number of users = 300

Films per user = 5  
Predictive Log Likelihood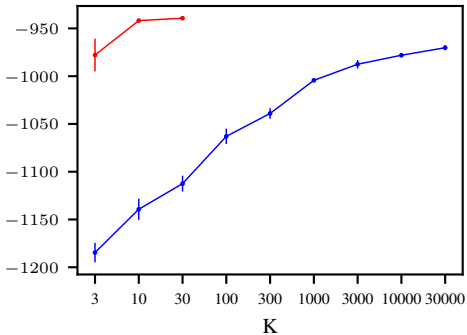

Supplement: supplementary_material [file attachment]

**a**

Predictive Log Likelihood

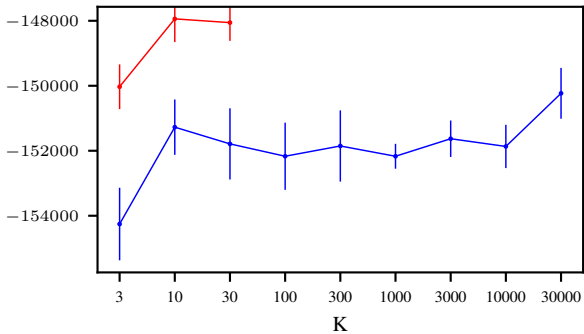

Supplement: supplementary_material [file attachment]

**b**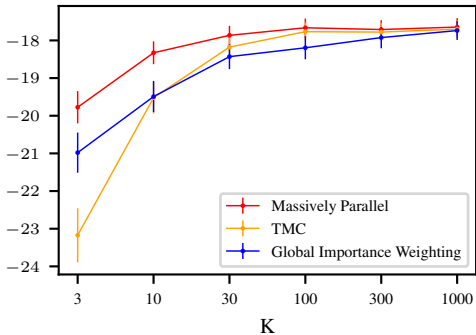

Supplement: supplementary_material [file attachment]

2 States, 2 Counties, 4 Zipcodes, 4 Readings

Final Lower Bound

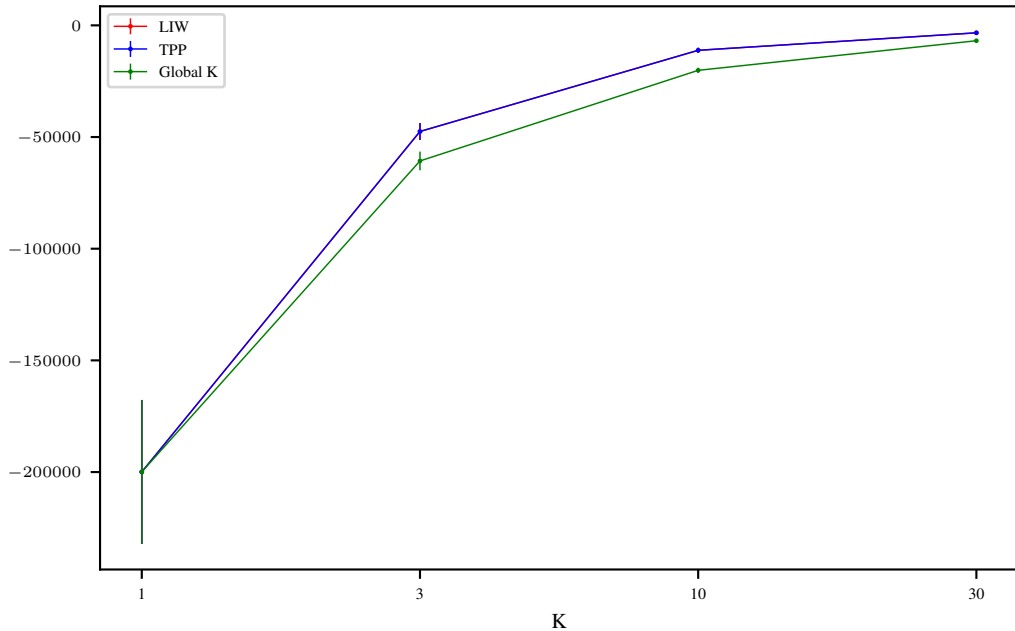

Supplement: supplementary_material [file attachment]

**b**

Predictive Log Likelihood

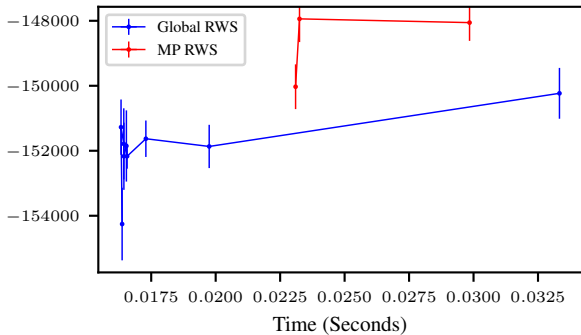

Supplement: supplementary_material [file attachment]

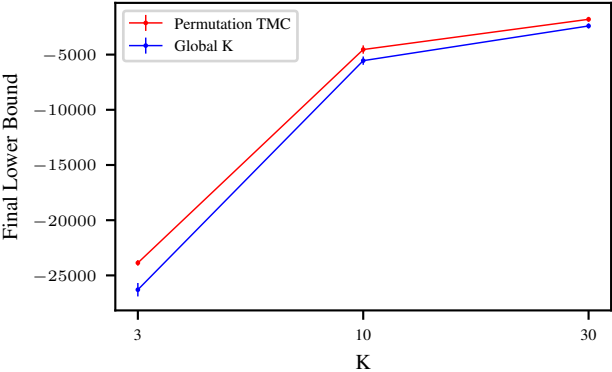

Supplement: supplementary_material [file attachment]

Evidence Lower Bound

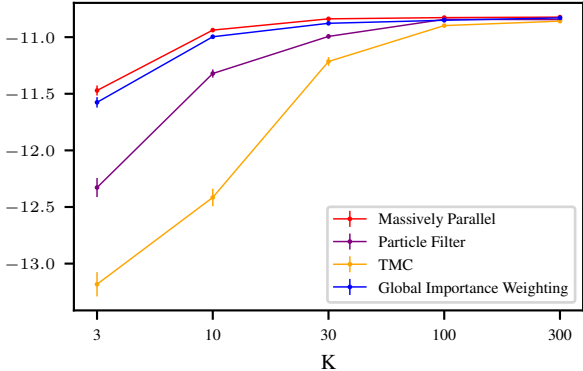

Supplement: supplementary_material [file attachment]
